# Supplementary material
Source: PubMed Central journal article supplement (PMC380977)
Supplement: 7600122s1.pdf [file 7600122s1.pdf]

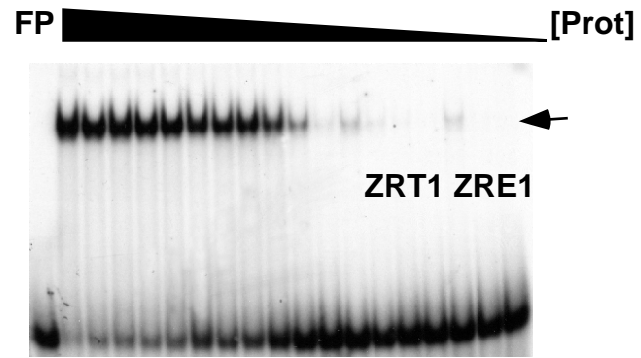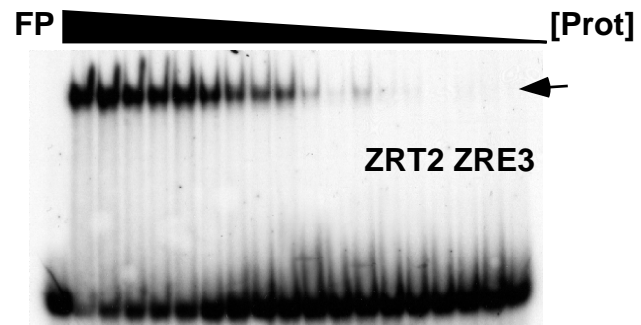

SUP. 1. **Zap1 binds to ZRT2 ZRE3 with a low affinity *in vitro*.** Electrophoretic mobility shift assays were performed with increasing amounts of purified Zap1<sub>687-880</sub> truncate ranging from pM to  $\mu$ M and a constant radiolabelled ZRE concentration. No protein was added to the free probe lane (FP). The ZRE oligonucleotide probes used were ZRT1 ZRE1 and ZRT2 ZRE3. Binding-isotherm plots were generated by quantifying phosphoimages of panels A and B (Fig. 4A). Arrows indicate the Zap1-DNA complexes. A representative experiment for each oligonucleotide probe is shown.
